# Supplementary material for: Isolation and Identification of Isocoumarin Derivatives With Specific Inhibitory Activity Against Wnt Pathway and Metabolome Characterization of Lasiodiplodia venezuelensis
Source: Front Chem. 2021 Aug 12;9:664489. doi: 10.3389/fchem.2021.664489 (PMC8397479; doi:10.3389/fchem.2021.664489)
Supplement: Supplementary file 1 [file Table2.XLSX]

## Sheet: TableS2
Table 2. Compounds annotated by UHPLC-HRMS/MS in ESI(+) in the A02EtM extract of Lasiodiplodia venezuelensis, in clusters annotated solely on the basis of the comparison of their MS/MS pattern against the in silico fragmentation database and the taxonomical re-ranking.
ID	N°	Comp. index	RT (min)	m/z	Molecular formula	Error (ppm)	Molecule Name	Initial rank	Initia score	Final rank	Final score	Class	SubClass	Parent level 1	Taxonomical occurence							Smiles	GNPS
Isolated				[M+H]+											Kingdom.	Phylum	Classe	Order	Family	Genus	Species
1506	C33_n1	33	1.32	211.32	C12H18O3	2.8	Botryosphaerinone	6	0.63	1	0.92	Organooxygen compounds	Carbonyl compounds	Ketones/cyclic ketones	✓	✓	✓	✓	✓	✓	X	CC\\C=C/CC1CC(=O)CC1CC(O)=O
	C33_n1'			or			Jasmonic acid	GNPS annotation							✓	✓	✓	✓	✓	✓	X	CC/C=C\C[C@@H]1[C@H](CCC1=O)CC(=O)O	Jasmmonic acid
6902	C33_n2	33	2.17	225.148	C13H20O3	2	methyl jasmonate	GNPS annotation				Fatty acyls	Lineolic acids and derivatives	jasmonic acids derivatives/cyclic ketones	✓	✓	✓	✓	✓	✓	X	O=C1CC(CC(OC)=O)C(C/C=C/CC)C1	Jethyl jasmonate
1769	C33_n3	33	1.96	223.13	C13H18O3	0.4	methyl 4,5-didehydrojasmonate	Manual annotation					Carboxylic acid esters	Cyclic ketones	X	X	X	X	X	X	X	O=C(CC1C(C/C=C/CC)C(C=C1)=O)OC
7040	C33_n4	33	2.126	243.159	C13H22O4	1.2	methyl 2-(2-(4-hydroxypentyl)-3-oxocyclopentyl)acetate	Manual annotation				Fatty acyls	Lineolic acids and derivatives	jasmonic acids derivatives/cyclic ketones								CC(O)CCCC(C(CC(OC)=O)CC1)C1=O
1867	C33_n5	33	2.58	229.144	C12H20O4	1.1	(-)-11-hydroxy-9,10-dihydrojasmonic acid	Manual annotation				Fatty acyls	Lineolic acids and derivatives	jasmonic acids derivatives/cyclic ketones								CC(O)CCCC1C(CC(O)=O)CCC1=O
8609	C33_n6	33	1.47	213.148	C12H20O3	3	Cucurbic acid6,7-Diepimer	16	0.895	1	0.494	Fatty Acyls	Lineolic acids and derivatives	Jasmonic acids	✓	✓	✓	✓	✓	✓	X	CC\\C=C\\CC1C(O)CCC1CC(O)=O
513	C33_n6'	33	1.9	213.148	C12H20O3	3	Jasmonic acid7-Epimer, 9,10-dihydro	17	0.894	2	0.492	Fatty Acyls	Lineolic acids and derivatives	Jasmonic acids	✓	✓	✓	✓	✓	✓	X	CCCCCC1C(CC(O)=O)CCC1=O
1389	C19_n1	19	2.7	297.169	C16H24O5	1.9	4-Hydroxy-4-[2-(6-hydroxy-1-heptenyl)-4-oxocyclopentyl]-2-butenoic acid	7	0.58	4	0.37	Fatty acyls	Lineolic acids and derivatives	jasmonic acids derivatives/cyclic ketones	✓	✓	X	X	X	X	X	CC(O)CCC\\C=C\\C1CC(=O)CC1C(O)\\C=C/C(O)=O
2933	C19_n2	19	1.71	255.158	C14H22O4	2.4	2-(4-Hydroxy-2-pentenyl)-3-oxo-1-cyclopentanebutanoic acid	7	0.6	1	0.91	Fatty acyls	Lineolic acids and derivatives	jasmonic acids derivatives/cyclic ketones	✓	✓	✓	✓	✓	✓	X	CC(O)\\C=C\\CC1C(CCCC(O)=O)CCC1=O
7824	C19_n3	19	2.04	257.178	C14H24O4	0.2	ethyl 2-(2-(4-hydroxypentyl)-3-oxocyclopentyl)acetate	Manual annotation				Fatty acyls	Lineolic acids and derivatives	jasmonic acids derivatives/cyclic ketones								O=C1C(CCCC(O)C)C(CC(OCC)=O)CC1
5297	C19_n4	19	2.06	239.168	C14H22O3	-	Jasmonic acid7-Epimer, Et ester	38	0.47	1	0.89	Fatty acyls	Lineolic acids and derivatives	jasmonic acids derivatives/cyclic ketones	✓	✓	✓	✓	✓	✓	X	CCOC(=O)CC1CCC(=O)C1C\\C=C\\CC
2776	C19_n5	19	1.77	237.149	C14H20O3	0.2	(E)-4-(4-oxo-5-(pent-2-en-1-yl)cyclopent-2-en-1-yl)butanoic acid	Manual annotation				Fatty acyls	Lineolic acids and derivatives	jasmonic acids derivatives/cyclic ketones								CC/C=C/CC1C(C=CC1=O)CCCC(O)=O
1313	C118_n1	118	7.556	375.31	C28H38	-	Ergosta-2,5,7,9(11),14,22-hexaene(22E,24R)-form	2	0.47	1	0.44	Steroids and steroid derivatives	Ergostane steroids	Ergostane steroids	✓	X	X	X	X	X	X	CC(C)C(C)\\C=C\\C(C)C1CC=C2C3=CC=C4CC=CCC4(C)C3=CCC12C
4375	C118_n2	118	7.39	393.317	C28H40O	-	Ergosta-4,6,8(14),22-tetraen-3-one(22E,24R)-form	3	0.32	1	0.48	Steroids and steroid derivatives	Steroids and steroid derivatives	Ergosterols and derivatives	✓	✓	✓	X	X	X	X	CC(C)C(C)\\C=C\\C(C)C1CCC2=C3C=CC4=CC(=O)CCC4(C)C3CCC12C	Confirmed with Standard
3021	C118_n3	118	6.197	409.313	C28H40O2	5.8	20-Hydroxyergosta-4,6,8(14),22-tetraen-3-one(20S,22E,24ξ)-form	1	0.43	1	0.51	Steroids and steroid derivatives	Steroids and steroid derivatives	Ergosterols and derivatives	✓	✓	✓	X	X	X	X	CC(C)C(C)\\C=C\\C(C)(O)C1CCC2=C3C=CC4=CC(=O)CCC4(C)C3CCC12C
1437	C118_n4	118	5.93	407.297	C28H38O2	6.4	3-Hydroxyergosta-4,6,8(14),22-tetraen-15-one(3β,22E,24R)-form3-Ketone	2	0.4	1	0.43	Steroids and steroid derivatives	Ergostane steroids	Ergosterols and derivatives	✓	✓	X	X	X	X	X	CC(C)C(C)\\C=C\\C(C)C1CC(=O)C2=C3C=CC4=CC(=O)CCC4(C)C3CCC12C
1952	C118_n5	118	5.02	425.306	C28H40O3	3.2	14-Hydroxyergosta-4,7,22-triene-3,6-dione(14α,22E,24R)-form	2	0.35	5	0.36	Steroids and steroid derivatives	Ergostane steroids	Ergosterols and derivatives	X	X	X	X	X	X	X	CC(C)C(C)\\C=C\\C(C)C1CCC2(O)C3=CC(=O)C4=CC(=O)CCC4(C)C3CCC12C
1270	C118_n6	118	5.79	427.323	C28H42O3	6.3	3,15-Dihydroxyergosta-5,8(14),22-trien-7-one(3β,15β,22E,24R)-form	5	0.4	4	0.36	Steroids and steroid derivatives	Ergostane steroids	Ergosterols and derivatives	X	X	X	X	X	X	X	CC(C)C(C)\\C=C\\C(C)C1CC(O)C2=C3C(CCC12C)C1(C)CCC(O)CC1=CC3=O
3857	C118_n7	118	6.885	423.329	C29H42O2	6.7	3-Hydroxyergosta-4,6,8(14),22-tetraen-15-one(3β,22E,24R)-form3-Ketone, 15β-alcohol, 15-Me ether	1	0.35	1	0.35	Steroids and steroid derivatives	Ergostane steroids	Ergosterols and derivatives	✓	X	X	X	X	X	X	COC1CC(C(C)\\C=C\\C(C)C(C)C)C2(C)CCC3C(C=CC4=CC(=O)CCC34C)=C12
5074	C73_n1	73	1.66	307.08	C15H14O7	5.1	Globosuxanthone A3,4-Dihydro	18	0.33		0.7	Benzopyrans	1-benzopyrans	Dibenzopyrans	✓	✓	✓	✓	✓	X	X	COC(=O)C1(O)C(O)CCC2=C1C(=O)C1=C(O)C=CC=C1O2
7856	C73_n2	73	1.87	321.096	C16H16O7	2.2	Microdiplodiasolol	18	0.28	1	0.7	Benzopyrans	1-benzopyrans	Dibenzopyrans	✓	✓	✓	✓	✓	X	X	COC1=CC(=O)C(O)C2(O)C(=O)C3=C(O)C=C(C)C=C3OC12C
5022	C961_n1	961	3.66	321.169	C18H24O5	2.1	3R-nordinone	33	0.23	1	0.79		Macrolides and analogues	Macrolides and analogues benzenoids lactones	✓	✓	✓	✓	✓	✓	X	CC1CCCCCCCC(CC2=CC(O)=CC(O)=C2C(O1)=O)=O
5445	C961_n2	961	2.5	293.137	C16H20O5	2.5	(3R)-6-Oxo-de-O-methyl-lasiodiplodin	Manual annotation					Macrolides and analogues	Macrolides and analogues benzenoids lactones	✓	✓	✓	✓	✓	✓	X	CC1CCC(CCCCC2=CC(O)=CC(O)=C2C(O1)=O)=O
6745	C193_n1	193	1.52	331.117	C18H18O6	1.3	Simplicildone A	Manual annotation				Depsides and depsidones	Depsides and depsidones	Depsides and depsidones	✓	✓	✓	✓	✓	✓	X	CC1=CC(=C(C2=C1C(=O)OC3=C(O2)C(=CC(=C3C)O)C)COC)O
1897	C717_n1	717	0.76	301.074	C16H12O6	10	Botryorhodine A	36	0.37	1	0.84	Depsides and depsidones	Depsides and depsidones	Depsides and depsidones	✓	✓	✓	✓	✓	✓	X	CC1=CC(O)=CC2=C1OC1=C(C(C)=CC(O)=C1C=O)C(=O)O2
354	C1_n1	1	4.51	323.185	C18H26O5	1	2,4-Dihydroxy-6-(8-hydroxynonyl)benzoic acid(R)-form1',2'-Didehydro(E-), Et ester	2	0.36	1	0.83	Benzene and substituted derivatives	Benzoic acids and substituted derivatives	p-Hydroxybenzoic acid alkyl esters	✓	✓	✓	✓	✓	✓	X	CCOC(=O)C1=C(O)C=C(O)C=C1\\C=C\\CCCCCC(C)O
232	C1_n2	1	4.4	279.159	C16H22O4	0.7	7-[2-Hydroxy-4-(hydroxymethyl)]-2,7-dimethyl-6-heptenoic acid(-)-(E)-form	18	0.42	5	0.56	Benzene and substituted derivatives	Benzoic acids and substituted derivatives	Phenylpropenes	✓	✓	X	X	X	X	X	CC(CCC\\C=C(/C)C1=C(O)C=C(CO)C=C1)C(O)=O
261	C1_n3	1	4.4	311.185	C17H26O5	0.4	3,4-Dihydroxy-7-(2-hydroxy-4-methylphenyl)-3,4-dimethyloctanoic acid	1	0.33	5	0.4	Benzene and substituted derivatives	Benzoic acids and substituted derivatives	1-hydroxy-4-unsubstituted benzenoid	✓	X	X	X	X	X	X	CC(CCC(C)(O)C(C)(O)CC(O)=O)C1=C(O)C=C(C)C=C1
7703	C395_n1	395	4.93	205.086	C12H12O3	1.3	Botryosphaeridione ( 7-Hydroxy-11,12,13-trinor-1,6,9-eremophilatriene-3,8-dione)	10	0.25	1	0.8	Organooxygen compounds	Carbonyl compounds	Ketones	✓	✓	✓	✓	✓	✓	X	CC1C(=O)C=CC2=CC(=O)C(O)=CC12C
6511	C395_n2	395	3.51	177.055	C10H8O3	1.5	1,3,8-Naphthalenetriol	7	0.35	1	0.61	Benzoids	naphtones derivatives	1-hydroxy-4-unsubstituted benzenoids	✓	✓	✓	X	X	X	X	OC1=CC(O)=C2C(O)=CC=CC2=C1
8025	C395_n3	395	3.38	223.099	C12H14O4	-	3,4-Dihydro-4,6,8-trihydroxy-7-methyl-1(2H)-naphthalenone(R)-form6-Me ether	22	0.28	4	0.52	Benzoids	tetralins	tetralins	✓	✓	X	X	X	X	X	COC1=C(C)C(O)=C2C(=O)CCC(O)C2=C1
6592	C937_n1	937	2.09	219.139	C14H18O2	1.9	Botryosphaerihydrofuran	39	0.4	1	0.84	Dioxanes	1,3-dioxanes	1,3-dioxanes	✓	✓	✓	✓	✓	✓	X	CC1COC23OC12CC1(C)C(C)C=CC1=C3
6715	C20_n1	20	1.05	197.128	C10H16N2O2	0.4	cyclo(L-Val-L-Pro)	2	0.66	2	0.55	Carboxylic acids and derivatives	Aminoacids, peptides and derivatives	Amino acids and derivatives	✓	✓	X	X	X	X	X	CC(C)[C@H]1C(=O)N2CCC[C@H]2C(=O)N1	Confirmed with Standard
3265	C20_n2	20	1.5	211.144	C11H18N2O2	0.6	Cyclo(leucylprolyl)(3S,8aS)-form	2	0.45	2	0.68	Carboxylic acids and derivatives	Aminoacids, peptides and derivatives	Amino acids and derivatives	✓	✓	✓	✓	X	X	X	CC(C)CC1N=C(O)C2CCCN2C1=O	Confirmed with Standard
1835	C20_n3	20	1.79	213.16	C11H20N2O2	0.1	Cyclo(leucylvalyl)(3R,6S)-form	1	0.55	1	0.68	Carboxylic acids and derivatives	Aminoacids, peptides and derivatives	Amino acids and derivatives	✓	✓	X	X	X	X	X	CC(C)CC1N=C(O)C(N=C1O)C(C)C	Confirmed with Standard
8327	C20_n4	20	1.66	245.129	C14H16N2O2	0.1	Cyclo(phenylalanylprolyl)(3S,8aS)-form	1	0.53	1	0.59	Carboxylic acids and derivatives	Aminoacids, peptides and derivatives	Amino acids and derivatives	✓	✓	✓	X	X	X	X	OC1=NC(CC2=CC=CC=C2)C(=O)N2CCCC12	Confirmed with Standard
